# Supplementary material
Source: Springer Nature journal article supplement (https://www.springermedizin.de/resource/supplementary/13045_2008_42_MOESM1_ESM.pdf/9660534)

|                         |   |   |           |           |           |           |           |           |           |                     |
|-------------------------|---|---|-----------|-----------|-----------|-----------|-----------|-----------|-----------|---------------------|
| Labeled DNA probe       | + | + | +         | +         | +         | +         | +         | +         | +         | +                   |
| HeLa NE                 | - | + | +         | +         | +         | +         | +         | +         | +         | +                   |
| Unlabeled DNA probe (M) | - | - | $10^{-3}$ | $10^{-7}$ | $10^{-6}$ | -         | -         | -         | -         | -                   |
| Scrambled oligo (M)     | - | - | -         | -         | -         | $10^{-3}$ | $10^{-7}$ | $10^{-6}$ | -         | -                   |
| Decoy oligo (M)         | - | - | -         | -         | -         | -         | -         | -         | $10^{-3}$ | $10^{-7}$ $10^{-6}$ |

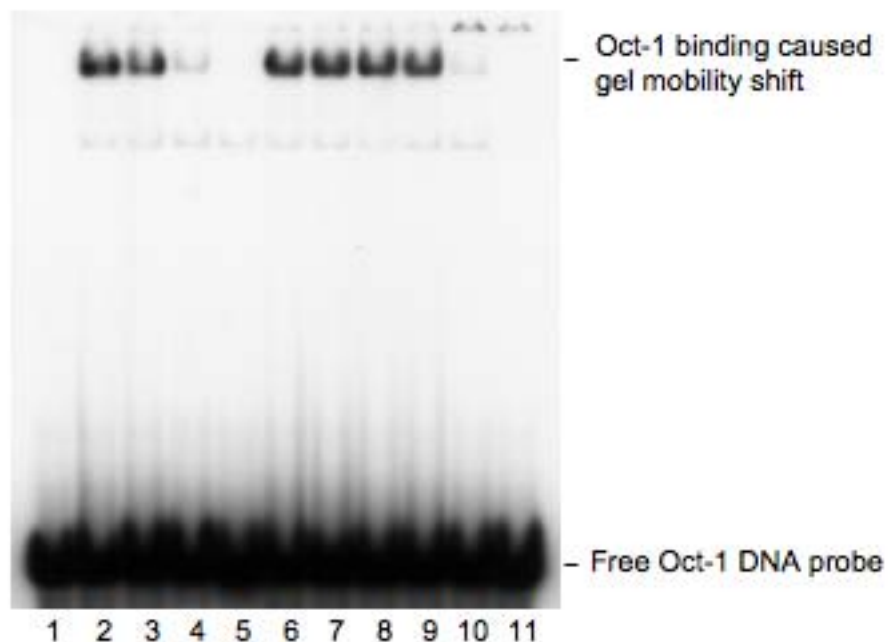

Supplement: MOESM1 [file 9660534]
